# Supplementary material
Source: PubMed Central journal article supplement (PMC5452885)
Supplement: ry161599suppa1.pdf [file ry161599suppa1.pdf]

**Table E1. T1, T2, and ADC Data in Dataset A and Dataset B**

| Diagnosis               | T1 (msec)    |      |     | T2 (msec)    |      |    | ADC ( $\times 10^{-3}$ mm <sup>2</sup> /sec) |       |       |
|-------------------------|--------------|------|-----|--------------|------|----|----------------------------------------------|-------|-------|
|                         | No. Sampled* | Mean | SD  | No. Sampled* | Mean | SD | No. Sampled*                                 | Mean  | SD    |
| NPZ (Dataset A)         | 120          | 2247 | 450 | 120          | 169  | 61 | 123                                          | 1.711 | 0.269 |
| NPZ (Dataset B)         | 43           | 2367 | 295 | 43           | 193  | 68 | 43                                           | 1.672 | 0.230 |
| PCa (Dataset A)         | 73           | 1628 | 344 | 73           | 73   | 27 | 80                                           | 0.773 | 0.311 |
| PCa (Dataset B)         | 26           | 1673 | 208 | 26           | 83   | 28 | 27                                           | 0.704 | 0.213 |
| Low -grade (Dataset A)  | 19           | 1679 | 422 | 19           | 93   | 30 | 22                                           | 0.999 | 0.331 |
| Low grade (Dataset B)   | 4            | 1655 | 197 | 4            | 120  | 9  | 4                                            | 1.040 | 0.050 |
| Int. grade (Dataset A)  | 40           | 1682 | 236 | 40           | 66   | 22 | 42                                           | 0.746 | 0.238 |
| Int. grade (Dataset B)  | 15           | 1725 | 216 | 15           | 75   | 22 | 16                                           | 0.705 | 0.170 |
| High grade (Dataset A)  | 14           | 1403 | 419 | 14           | 67   | 28 | 16                                           | 0.529 | 0.244 |
| High grade (Dataset B)  | 7            | 1574 | 184 | 7            | 79   | 33 | 7                                            | 0.510 | 0.68  |
| Prostatitis (Dataset A) | 27           | 1707 | 377 | 27           | 79   | 37 | 27                                           | 0.911 | 0.239 |
| Prostatitis (Dataset B) | 11           | 1637 | 318 | 11           | 96   | 38 | 11                                           | 0.850 | 0.240 |

Note.—Dataset A is composed of all lesions, dataset B is composed of only those targeted for biopsy. High-grade tumors had a Gleason score of at least 8, intermediate-grade tumors had a Gleason score of 7, low-grade tumors had a Gleason score of 6. Int. = intermediate, PCa = prostate cancer, SD = standard deviation.

\* All counts are for number of regions and/or lesions sampled. NPZ measurements from patients who chose not to undergo biopsy were also included in analysis.

**Table E2. PI-RADS Scores in Dataset B according to Histology Type**

| PI-RADS Version 2 Score | Prostatitis* | Low -Grade Prostate Cancer <sup>†</sup> | Intermediate-Grade Prostate Cancer <sup>‡</sup> | High-Grade Prostate Cancer |
|-------------------------|--------------|-----------------------------------------|-------------------------------------------------|----------------------------|
| 1                       | 3            | 0                                       | 0                                               | 0                          |
| 2                       | 5            | 2                                       | 0                                               | 0                          |
| 3                       | 7            | 2                                       | 2                                               | 0                          |
| 4                       | 0            | 1                                       | 9                                               | 1                          |
| 5                       | 0            | 0                                       | 5                                               | 6                          |

Note.—Data are numbers of lesions and/or tumors.

\* Includes one lesion with lost data and three lesions that were not well-delineated with MR fingerprinting.

<sup>†</sup> Includes one lesion that was not well-delineated with MR fingerprinting.

<sup>‡</sup> Includes one lesion that was not well-delineated with MR fingerprinting.
